# Supplementary material for: Analyses on intracellular Fe3+ with a rhodamine probe: “turn-on” response, specific recognition and bioimaging
Source: Royal Society of Chemistry journal article supplement (doi:10.1039/d2ay00280a), 2022-01-01
Supplement: d2ay00280a1.pdf [file d2ay00280a1.pdf]

## Supplementary Information

### **Analyses on intracellular Fe<sup>3+</sup> with a rhodamine probe: “turn-on” response, specific recognition and bioimaging**

Zhao Cheng <sup>a,\*</sup>, Xiaojing Liu <sup>b</sup>, Lei Zheng <sup>a</sup>, Yue Xu <sup>a</sup>, Hao He <sup>a</sup>

<sup>a</sup> School of Pharmacy, Xi'an Medical University, Xi'an Shaanxi 710021, PR China.

<sup>b</sup> College of Chemistry & Materials Science, Northwest University, Xi'an Shaanxi 710127, PR China

\* Corresponding author: Zhao Cheng, [chengzhao@ximi.edu.cn](mailto:chengzhao@ximi.edu.cn).

#### **Contents:**

**Synthesis of rhodamine B acyl chloride**

**Table S1** Crystallographic data of **J3**.

**Fig. S1** ESI-MS of **J3**.

**Fig. S2** IR of **J3**.

**Fig. S3** <sup>1</sup>H NMR of **J3**.

**Fig. S4** <sup>13</sup>C NMR of **J3**.

**Fig. S5** UV-vis absorption selectivity and competition of **J3** towards Fe<sup>3+</sup> in Fe<sup>3+</sup>-competing ions coexisting systems.

**Fig. S6** UV-vis absorption titration of **J3** by Fe<sup>3+</sup>.

### Synthesis of rhodamine B acyl chloride

Rhodamine B (1.59 g, 3.32 mmol) was dissolved in 15 mL 1,2-dichloroethane, then phosphorus oxychloride (1 mL, 10.7 mmol) was added dropwise to the rhodamine B solution with stirring. The reaction mixture was refluxed for 4 h. After the reaction, the mixture was concentrated *in vacuo* to eliminate the leftover 1,2-dichloroethane and unreacted phosphorus oxychloride, affording rhodamine B acyl chloride.

**Table S1** Crystallographic data of **J3**.

| Compound                          | <b>J3</b>                                                     |
|-----------------------------------|---------------------------------------------------------------|
| Molecular Formula                 | C <sub>32</sub> H <sub>33</sub> N <sub>5</sub> O <sub>2</sub> |
| Molecular Weight                  | 519.63                                                        |
| Crystal system                    | Monoclinic                                                    |
| Space group                       | P2(1)/n                                                       |
| a/Å                               | 12.828(4)                                                     |
| b/Å                               | 16.694(5)                                                     |
| c/Å                               | 13.040(4)                                                     |
| $\alpha$ /°                       | 90                                                            |
| $\beta$ /°                        | 101.773(6)                                                    |
| $\gamma$ /°                       | 90                                                            |
| Z                                 | 4                                                             |
| V/Å <sup>3</sup>                  | 2733.9(13)                                                    |
| F(000)                            | 1104                                                          |
| No. refs measured                 | 13549                                                         |
| No.unique-refs(Rint)              | 4803 (0.0885)                                                 |
| R <sub>1</sub> [I>2 $\sigma$ (I)] | 0.0598                                                        |
| wR <sub>2</sub> (all data)        | 0.1586                                                        |
| Goodness of fit                   | 0.943                                                         |

**Acquisition Parameter**

|             |            |                       |           |                  |           |
|-------------|------------|-----------------------|-----------|------------------|-----------|
| Source Type | ESI        | Ion Polarity          | Positive  | Set Nebulizer    | 0.4 Bar   |
| Focus       | Not active | Set Capillary         | 4500 V    | Set Dry Heater   | 180 °C    |
| Scan Begin  | 50 m/z     | Set End Plate Offset  | -500 V    | Set Dry Gas      | 4.0 l/min |
| Scan End    | 3000 m/z   | Set Collision Cell RF | 110.0 Vpp | Set Divert Valve | Source    |

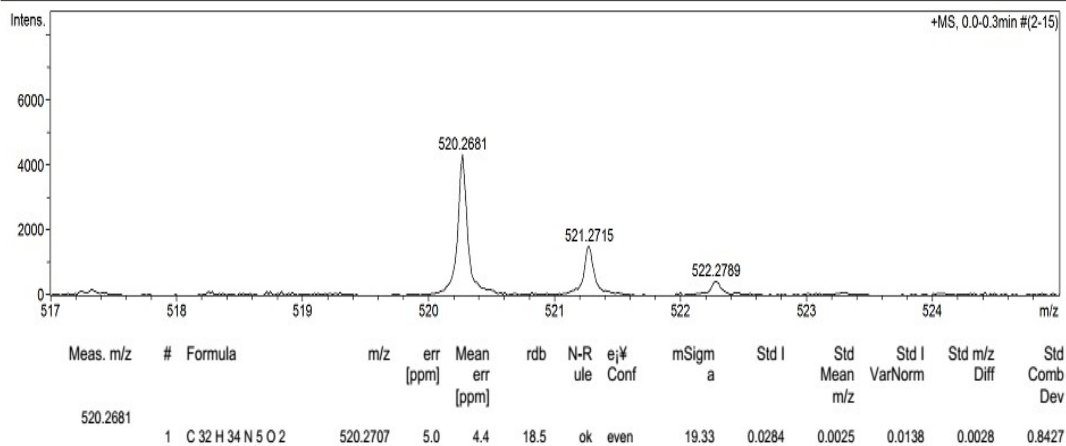**Fig. S1 ESI-MS of J3.**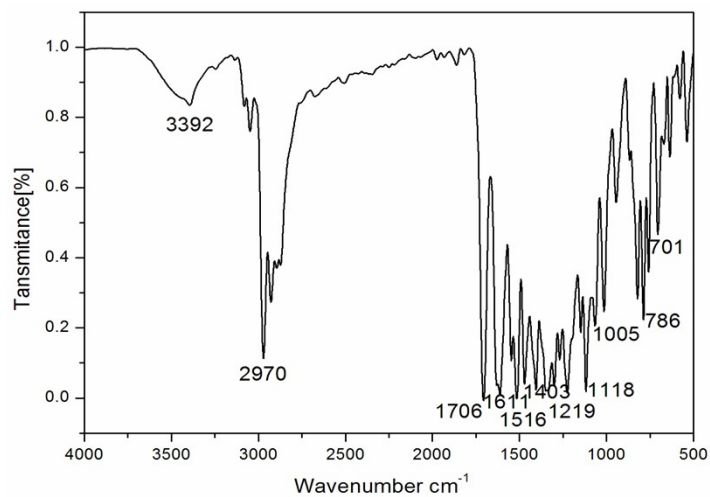**Fig. S2 IR of J3.**

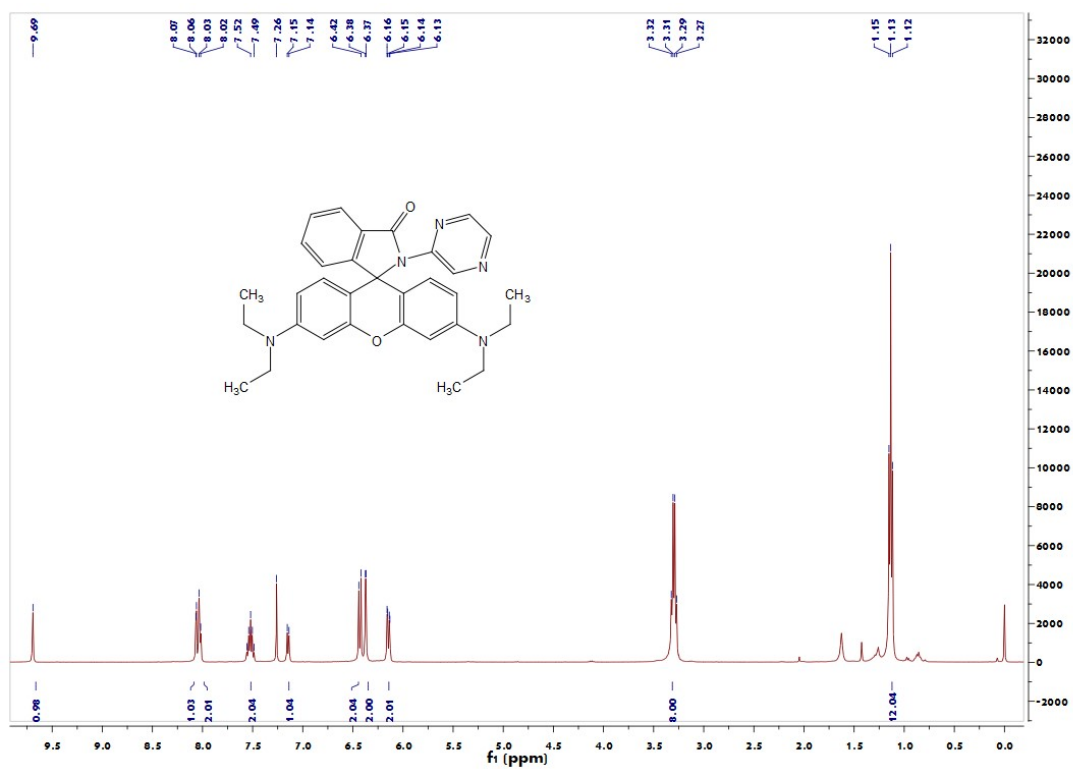

Fig. S3 <sup>1</sup>H NMR of J3.

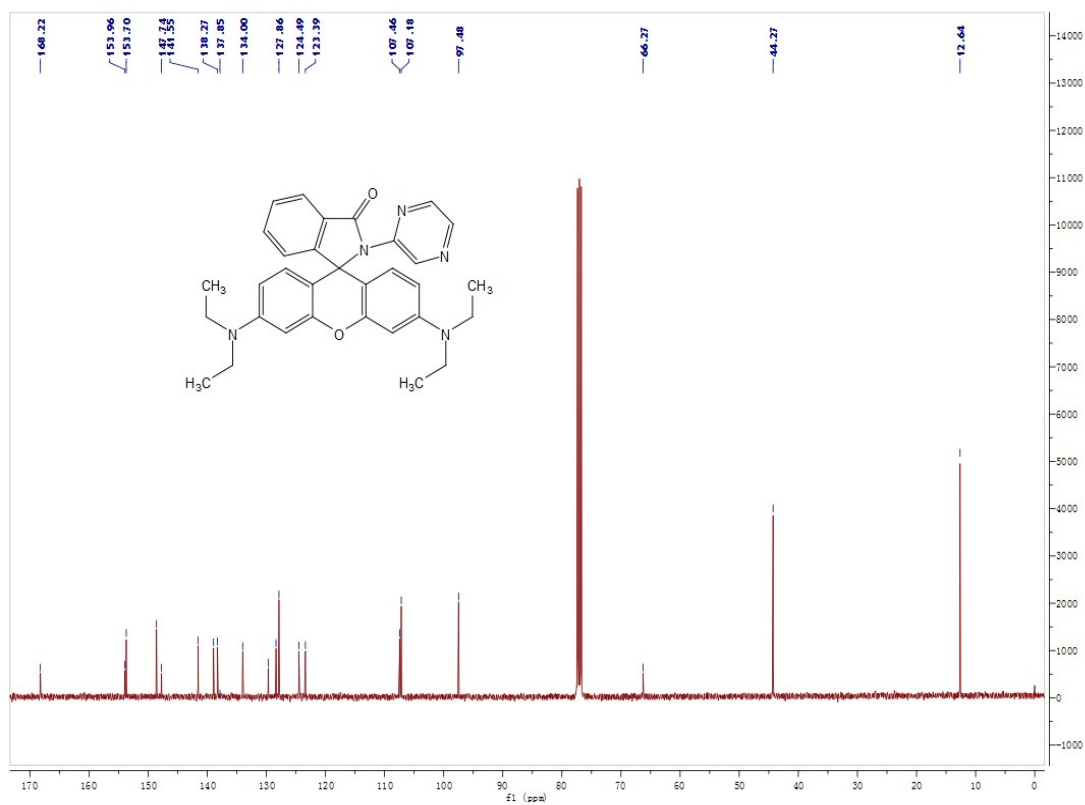

Fig. S4 <sup>13</sup>C NMR of J3.

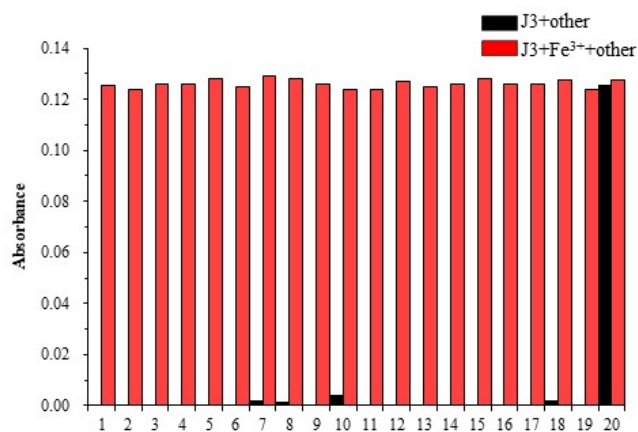

**Fig. S5** UV-vis absorption selectivity and competition of **J3** towards  $\text{Fe}^{3+}$  in  $\text{Fe}^{3+}$ -competing ions coexisting systems.

\*Black bars: absorbance of **J3** and competing ions at 523 nm.

Red bars: subsequent addition of  $10 \mu\text{mol L}^{-1}$   $\text{Fe}^{3+}$  to the black bars-represented solutions.

Metal ions (from left to right) : 1:  $\text{K}^+$ , 2:  $\text{Ca}^{2+}$ , 3:  $\text{Mg}^{2+}$ , 4:  $\text{Ba}^{2+}$ , 5:  $\text{Mn}^{2+}$ , 6:  $\text{Cu}^{2+}$ , 7:  $\text{Zn}^{2+}$ , 8:  $\text{Cr}^{3+}$ , 9:  $\text{Hg}^{2+}$ , 10:  $\text{Ag}^+$ , 11:  $\text{Cd}^{2+}$ , 12:  $\text{Ni}^{2+}$ , 13:  $\text{Li}^+$ , 14:  $\text{NH}_4^+$ , 15:  $\text{Al}^{3+}$ , 16:  $\text{Sn}^{2+}$ , 17:  $\text{Co}^{2+}$ , 18:  $\text{Pb}^{2+}$ , 19:  $\text{Fe}^{2+}$  and 20:  $\text{Fe}^{3+}$ .

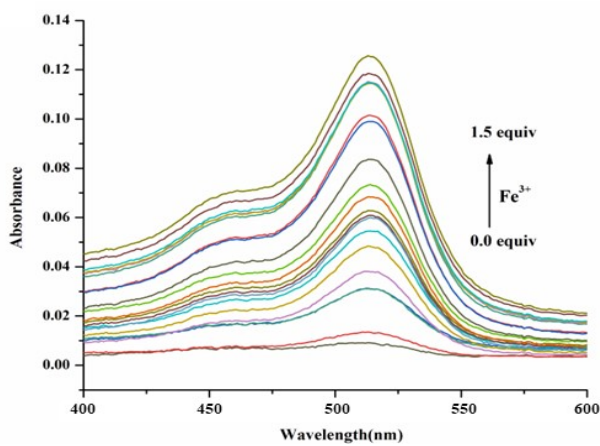

**Fig. S6** UV-vis absorption titration of **J3** by  $\text{Fe}^{3+}$ .
